# Supplementary material for: ARABIDOPSIS HOMOLOG of TRITHORAX1 (ATX1) is required for cell production, patterning, and morphogenesis in root development
Source: PubMed Central journal article supplement (PMC4246177; doi:10.1093/jxb/eru355), 2014-09-09

***ARABIDOPSIS* HOMOLOG of *TRITHORAX1* (*ATX1*) is required for cell production, patterning, and morphogenesis in root development**

Selene Napsucialy-Mendivil, Raúl Alvarez-Venegas, Svetlana Shishkova, and Joseph G. Dubrovsky

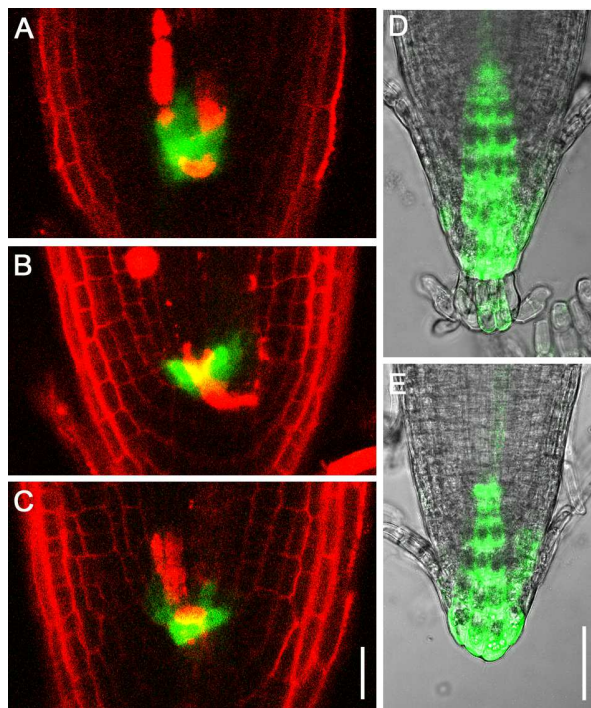

**Figure S1.** Expansion of the *pWOX5::GFP* expression domain and the auxin response in the primary root apical meristem of the *atx1-1* mutant. (A-C) Root apical meristem (RAM) of *atx1-1* seedlings,  $n = 29$ . (D and E) *DR5rev::GFP* expression in Wt (Ws) (D) and *atx1-1* (E) primary roots;  $n = 12-15$  in three independent experiments; 8 dpg plants were analyzed. Bar = 50  $\mu\text{m}$ .

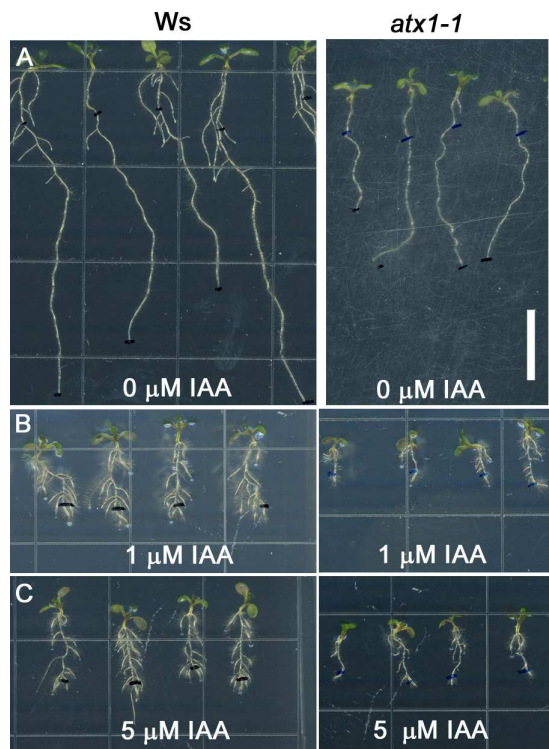

**Figure S2.** Effect of auxin on root development in Wt (*Ws*) and *atx1-1* plants. (A) *Ws* and *atx1-1* seedlings at 8 dpg. (B, C) Seedlings were germinated and grown for 3 days in normal medium and then transferred to the same medium or media supplemented with 1 or 5  $\mu\text{M}$  IAA and grown for five additional days. (D) Primary root length of untreated and IAA-treated seedlings at 8 dpg,  $n = 8$ . (E) Expression analysis of *IAA14* by RT-qPCR. Plant material was harvested from the roots of 8-dpg *Ws* and *atx1-1* seedlings untreated or treated with 1  $\mu\text{M}$  NAA for 12 hours. Data were normalized for the expression level of two reference genes, *UBQ10* and *EF1 $\alpha$* . Means  $\pm$  SE of two independent experiments are shown. Scale bar = 10 mm.

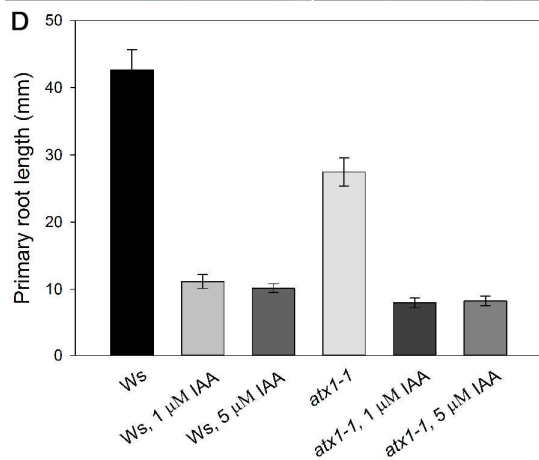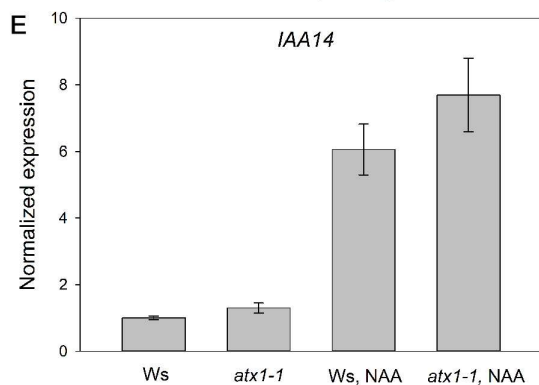

Supplement: supp_eru355_jexbot125583_file001.pdf [file supp_eru355_jexbot125583_file001.pdf]
